# Supplementary material for: COVID-19 Pandemic and Exercise (COPE) trial: a multigroup pragmatic randomised controlled trial examining effects of app-based at-home exercise programs on depressive symptoms
Source: HighWire-hosted journal article supplement (doi:10.1136/bjsports-2021-104379), 2021-09-27

## Supplemental Materials

### Table of Contents

|                                                                             |    |
|-----------------------------------------------------------------------------|----|
| Methods.....                                                                | 2  |
| Statistical Approach.....                                                   | 2  |
| Demographic Data Coding .....                                               | 4  |
| References.....                                                             | 4  |
| Mplus Code.....                                                             | 6  |
| All Participants Sample, Including Treatment Groups .....                   | 6  |
| High Depression Sample, Including Treatment Groups – Free Time Scores ..... | 9  |
| Tables.....                                                                 | 12 |
| Figures.....                                                                | 34 |

### Table of Tables

|                                                                                                                                                                                           |    |
|-------------------------------------------------------------------------------------------------------------------------------------------------------------------------------------------|----|
| Table S1 - Missing Surveys at Item and Survey Levels. ....                                                                                                                                | 12 |
| Table S2 - Fit Indices for the Primary SEM Models. ....                                                                                                                                   | 13 |
| Table S3 - Income Grouping.....                                                                                                                                                           | 14 |
| Table S4 - Employment Grouping.....                                                                                                                                                       | 16 |
| Table S5 - Education Grouping. ....                                                                                                                                                       | 19 |
| Table S6 - Cultural Background Grouping.....                                                                                                                                              | 20 |
| Table S7 - Marital Status Groupings. ....                                                                                                                                                 | 23 |
| Table S8 - Weekly Survey Response Rate, N (%), by Experimental Grouping.....                                                                                                              | 24 |
| Table S9 – Average Number of Minutes of DownDog Exercises Completed by Week and Experimental Group.....                                                                                   | 25 |
| Table S10 – Weekly Average (SD) Minutes of Moderate-to-Vigorous Physical Activity (Not Including App Usage) for Each Group .....                                                          | 26 |
| Table S11 - Estimates for Trajectories for HIIT (A) and Comparisons with WLC, Yoga and HIIT+Yoga Groups (B1-3). ....                                                                      | 28 |
| Table S12 - Estimates for Trajectories for HIIT+Yoga (A) and Comparisons with WLC, HIIT and Yoga Groups (B1-3).....                                                                       | 29 |
| Table S13 - Estimates for Trajectories for Yoga (A) and Comparisons with WLC, HIIT and HIIT+Yoga Groups (B1-3). ....                                                                      | 30 |
| Table S14 - Effect Sizes for Model with all Individuals and Model including only those with High Depressive Symptoms at Baseline.....                                                     | 31 |
| Table S15 - Estimates for Trajectories for WLC (A) and Comparisons with WLC, HIIT and HIIT+Yoga Groups (B1 & B2) in Participants with High Levels of Depression Symptoms at Baseline..... | 33 |

### Table of Figures

|                                                                                                            |    |
|------------------------------------------------------------------------------------------------------------|----|
| Figure S1 - SEM Path Diagram for Model including all Participants. ....                                    | 34 |
| Figure S2 - SEM Path Diagram for Model including Participants with High Baseline Depressive Symptoms. .... | 34 |

## Methods

Details about the Downdog app. The HIIT workout app includes >1,000 activities that require no weights or other instrumentation. At the start of each workout session, users can choose the percent of the workout that is aerobic vs. resistance training, difficulty level, type of program (e.g. Tabata, circuit training), length of session (1 min to 90min), warmup/cooldown length, interval/recovery period length, music style, and narrator's voice. The Yoga workout app includes >1,400 yoga poses, and participants can select different types of yoga practices (e.g. Ashtanga, Hatha), difficulty levels, length (5min to 90min), pace, music style, and voice. Following selection of these features in either app, a video is streamed together from the library, providing opportunities for a novel configuration each workout.

Godin Leisure Time Exercise Questionnaire. All participants completed the Godin Leisure Time Exercise Questionnaire (Courneya et al., 2004; Godin & Shephard, 1985) on a weekly basis, and indicated number and duration of light, moderate, and vigorous exercise sessions. Consistent with Courneya et al. (2004), total number of minutes of MVPA were tabulated for each participant by multiplying the number of sessions and minutes of moderate exercise and multiplying the number of sessions and minutes of vigorous exercise, and summing these two values. Consistent with recommendations by others (Tabachnick & Fidell, 2013; Wierst et al., in press), weekly out of range values ( $\geq 25$  moderate and vigorous exercise sessions) and outliers with Z scores above 3.29 were removed.

## Statistical Approach

Quadratic latent growth models. For the full sample quadratic latent growth models, we first conducted an unconditional growth model to estimate intercept (I), slope (S), and quadratic (Q)

terms. Next, we included three dummy-coded variables for the active groups, with WLC set as the comparator, to test the prespecified treatment effects of each active group on I, S, and Q.

Statistical models for quadratic latent growth model. The equations of the conditional quadratic latent growth model are provided as follows.

$$Y_{ti} = I_i + S_i * TIME_t + Q_i * TIME_t^2 + \varepsilon_{ti}$$

$$I_i = b_{00} + b_{01}G1 + b_{02}G2 + b_{03}G3 + \zeta_{0i}$$

$$S_i = b_{10} + b_{11}G1 + b_{12}G2 + b_{13}G3 + \zeta_{1i}$$

$$Q_i = b_{20} + b_{21}G1 + b_{22}G2 + b_{23}G3 + \zeta_{2i}$$

where  $Y_{ti}$  denotes the outcome for each individual participant ( $i = 1, 2, \dots, n$ ) at each time point ( $t = 0, 1, 2, \dots, 6$ ),  $TIME_t$  denotes time scores (i.e., 0, 1, ..., 6),  $I_i$  refers to the latent intercept factor,  $S_i$  refers to the latent linear slope factor,  $Q_i$  refers to the latent quadratic slope factor, the regression coefficients for treatment conditions (G1, G2, & G3) are denoted using  $b$ ,  $\varepsilon_{ti}$  denotes the individual residuals, and  $\zeta_{0i}$ ,  $\zeta_{1i}$ , and  $\zeta_{2i}$  denote the corresponding residuals for the latent growth factors ( $I_i$ ,  $S_i$ , &  $Q_i$ ).

Cohen's  $d$ . The general formula of the effect size measure is Cohen's  $d = (b * \text{duration}) / SD$  where  $b$  denotes regression coefficient(s) of the treatment condition, duration depends on the number of weeks for a particular time point, and SD is calculated as the sum of all the corresponding variance components.

Model fit indices. Three commonly used model fit indices were used to ascertain model fit, namely a comparative fit index (CFI), the root mean square error of approximation (RMSEA), and the standardized root mean square residual (SRMR). The criteria for evaluating model fit were designated with CFI values  $>0.90$ , and RMSEA and SRMR values  $<.08$ .<sup>32,33</sup>

### **Imputation**

Random forest imputation was used to impute weekly Center for Epidemiologic Studies Depression (CESD) item responses when data were missing for one or more responses to the CESD for those participants who had completed some survey data on that given week (Table S1, Non-Completely Missing Survey). Imputation was done by taking the data for each week and splitting it into those with surveys and those without. For those with surveys, any items on the CESD with missing data were imputed based on all other participant data from all weeks. Once imputation was complete, the data were rejoined with the data of those without surveys that week. This process was then repeated for each subsequent week. On occasions in which participants did not submit a completed weekly survey (Table S1, Completely Missing Surveys), no imputation was completed since the statistical approach used can handle missing data.

### **Demographic Data Coding**

Several of the demographic variables were group together for ease of communication in tables. This was done for income (Table S3), employment (Table S4), education (Table S5), cultural background (Table S6) and marital status (Table S7).

### **References not Included in the Main Manuscript**

- Courneya, K. S., Jones, L. W., Rhodes, R. E., & Blanchard, C. M. (2004). Effects of Different Combinations of Intensity Categories on Self-Reported Exercise. *Research Quarterly for Exercise and Sport*, 75(4), 429–433. <https://doi.org/10.1080/02701367.2004.10609176>
- Godin, G., & Shephard, R. J. (1985). A simple method to assess exercise behavior in the community. *Canadian Journal of Applied Sport Sciences. Journal Canadien Des Sciences Appliquees Au Sport*, 10(3), 141–146.
- Tabachnick, B. G., & Fidell, L. S. (2013). *Using Multivariate Statistics* (6th editio). Pearson.
- Wierst, C., Zumbo, B., Rhodes, R. E., Faulkner, G. E., & Beauchamp, M. R. (in press). An

examination of Dweck's psychological needs model in relation to exercise-related well-being. *Journal of Sport and Exercise Psychology*, 1–12. <https://doi.org/10.1123/jsep.2021-0026>

**Mplus Code*****All Participants Sample, Including Treatment Groups***

VARIABLE: NAMES ARE id cond g1 g2 g3 male age

CESD0 CESD1 CESD2 CESD3 CESD4 CESD5 CESD6 CESD12;

MISSING=ALL(999);

USEVARIABLES ARE g1 g2 g3

CESD0 CESD1 CESD2 CESD3 CESD4 CESD5 CESD6;

ANALYSIS: ESTIMATOR = MLR;

STITERATIONS=20000;

ITERATION = 40000;

MODEL:

i s q | CESD0@0 CESD1@1 CESD2@2 CESD3@3 CESD4@4 CESD5@5 CESD6@6;

i s q ON g1 g2 g3;

s ON g1 (bs1);

s ON g2 (bs2);

s ON g3 (bs3);

q ON g1 (bq1);

q ON g2 (bq2);

q ON g3 (bq3);

i(v0);

CESD0 - CESD6 (r0-r6);

## MODEL CONSTRAINT:

NEW(g1dt1 g1dt2 g1dt3 g1dt4 g1dt5 g1dt6);

$$g1dt1 = (bs1*1 + bq1*1)/\sqrt{(v0+r0/2+r1/2)};$$

$$g1dt2 = (bs1*2 + bq1*4)/\sqrt{(v0+r0/3+r1/3+r2/3)};$$

$$g1dt3 = (bs1*3 + bq1*9)/\sqrt{(v0+r0/4+r1/4+r2/4+r3/4)};$$

$$g1dt4 = (bs1*4 + bq1*16)/\sqrt{(v0+r0/5+r1/5+r2/5+r3/5+r4/5)};$$

$$g1dt5 = (bs1*5 + bq1*25)/\sqrt{(v0+r0/6+r1/6+r2/6+r3/5+r4/6+r5/6)};$$

$$g1dt6 = (bs1*6 + bq1*36)/\sqrt{(v0+r0/7+r1/7+r2/7+r3/7+r4/7+r5/7+r6/7)};$$

NEW(g2dt1 g2dt2 g2dt3 g2dt4 g2dt5 g2dt6);

$$g2dt1 = (bs2*1 + bq2*1)/\sqrt{(v0+r0/2+r1/2)};$$

$$g2dt2 = (bs2*2 + bq2*4)/\sqrt{(v0+r0/3+r1/3+r2/3)};$$

$$g2dt3 = (bs2*3 + bq2*9)/\sqrt{(v0+r0/4+r1/4+r2/4+r3/4)};$$

$$g2dt4 = (bs2*4 + bq2*16)/\sqrt{(v0+r0/5+r1/5+r2/5+r3/5+r4/5)};$$

$$g2dt5 = (bs2*5 + bq2*25)/\sqrt{(v0+r0/6+r1/6+r2/6+r3/5+r4/6+r5/6)};$$

$$g2dt6 = (bs2*6 + bq2*36)/\sqrt{(v0+r0/7+r1/7+r2/7+r3/7+r4/7+r5/7+r6/7)};$$

NEW(g3dt1 g3dt2 g3dt3 g3dt4 g3dt5 g3dt6);

$$g3dt1 = (bs3*1 + bq3*1)/\sqrt{(v0+r0/2+r1/2)};$$

$$g3dt2 = (bs3*2 + bq3*4)/\sqrt{(v0+r0/3+r1/3+r2/3)};$$

$$g3dt3 = (bs3*3 + bq3*9)/\sqrt{(v0+r0/4+r1/4+r2/4+r3/4)};$$

$$g3dt4 = (bs3*4 + bq3*16)/\sqrt{(v0+r0/5+r1/5+r2/5+r3/5+r4/5)};$$

$$g3dt5 = (bs3*5 + bq3*25)/\sqrt{(v0+r0/6+r1/6+r2/6+r3/5+r4/6+r5/6)};$$

$$g3dt6 = (bs3*6 + bq3*36)/\sqrt{(v0+r0/7+r1/7+r2/7+r3/7+r4/7+r5/7+r6/7)};$$

OUTPUT: SAMPSTAT CINTERVAL STANDARDIZED RESIDUAL MODINDICES (3.84);



**High Depression Sample, Including Treatment Groups – Free Time Scores**

VARIABLE: NAMES ARE id cond g1 g2 g3 male age

CESD0 CESD1 CESD2 CESD3 CESD4 CESD5 CESD6 CESD12;

MISSING=ALL(999);

USEVARIABLES ARE g1 g2 g3 CESD0 CESD1 CESD2 CESD3 CESD4 CESD5 CESD6;

ANALYSIS: ESTIMATOR = MLR;

STITERATIONS=5000;

ITERATION = 20000;

MODEL:

i s | CESD0@0 CESD1@1 CESD2\* CESD3\* CESD4\* CESD5\* CESD6\*;

i s ON g1 g2 g3;

s ON g1 (bs1);

s ON g2 (bs2);

s ON g3 (bs3);

i(v0);

CESD1 - CESD6 (r1-r6);

CESD0@0;

CESD1 WITH CESD2-CESD4;

CESD2 WITH CESD3-CESD5;

CESD3 WITH CESD4-CESD6;

CESD4 WITH CESD5-CESD6;

CESD5 WITH CESD6;

MODEL CONSTRAINT:

NEW(g1dt1 g1dt2 g1dt3 g1dt4 g1dt5 g1dt6);

$g1dt1 = (bs1 * 1) / \sqrt{v0 + r1}$ ;

$g1dt2 = (bs1 * 2) / \sqrt{v0 + r1/2 + r2/2}$ ;

$g1dt3 = (bs1 * 3) / \sqrt{v0 + r1/3 + r2/3 + r3/3}$ ;

$g1dt4 = (bs1 * 4) / \sqrt{v0 + r1/4 + r2/4 + r3/4 + r4/4}$ ;

$g1dt5 = (bs1 * 5) / \sqrt{v0 + r1/5 + r2/5 + r3/5 + r4/5 + r5/5}$ ;

$g1dt6 = (bs1 * 6) / \sqrt{v0 + r1/6 + r2/6 + r3/6 + r4/6 + r5/6 + r6/6}$ ;

NEW(g2dt1 g2dt2 g2dt3 g2dt4 g2dt5 g2dt6);

$g2dt1 = (bs2 * 1) / \sqrt{v0 + r1}$ ;

$g2dt2 = (bs2 * 2) / \sqrt{v0 + r1/2 + r2/2}$ ;

$g2dt3 = (bs2 * 3) / \sqrt{v0 + r1/3 + r2/3 + r3/3}$ ;

$g2dt4 = (bs2 * 4) / \sqrt{v0 + r1/4 + r2/4 + r3/4 + r4/4}$ ;

$g2dt5 = (bs2 * 5) / \sqrt{v0 + r1/5 + r2/5 + r3/5 + r4/5 + r5/5}$ ;

$g2dt6 = (bs2 * 6) / \sqrt{v0 + r1/6 + r2/6 + r3/6 + r4/6 + r5/6 + r6/6}$ ;

NEW(g3dt1 g3dt2 g3dt3 g3dt4 g3dt5 g3dt6);

$g3dt1 = (bs3 * 1) / \sqrt{v0 + r1}$ ;

$$g3dt2 = (bs3*2)/\sqrt{(v0+r1/2+r2/2)};$$

$$g3dt3 = (bs3*3)/\sqrt{(v0+r1/3+r2/3+r3/3)};$$

$$g3dt4 = (bs3*4)/\sqrt{(v0+r1/4+r2/4+r3/4+r4/4)};$$

$$g3dt5 = (bs3*5)/\sqrt{(v0+r1/5+r2/5+r3/5+r4/5+r5/5)};$$

$$g3dt6 = (bs3*6)/\sqrt{(v0+r1/6+r2/6+r3/6+r4/6+r5/6+r6/6)};$$

OUTPUT: SAMPSTAT CINTERVAL STANDARDIZED RESIDUAL;

**Tables***Table S1 - Missing Surveys at Item and Survey Levels.*

| <b>Week</b> | <b>Non-missing Survey<br/>(All items complete)</b> | <b>Non-Completely Missing<br/>Survey (Missing <math>\geq 1</math> items)</b> | <b>Completely Missing<br/>Surveys</b> |
|-------------|----------------------------------------------------|------------------------------------------------------------------------------|---------------------------------------|
| 0           | 327                                                | 7                                                                            | 0                                     |
| 1           | 306                                                | 9                                                                            | 19                                    |
| 2           | 299                                                | 5                                                                            | 30                                    |
| 3           | 290                                                | 2                                                                            | 42                                    |
| 4           | 287                                                | 6                                                                            | 41                                    |
| 5           | 276                                                | 6                                                                            | 52                                    |
| 6           | 284                                                | 6                                                                            | 44                                    |

*Table S2 - Fit Indices for the Primary SEM Models.*

| <b>Measure</b>                                        | <b>All Participants - Quadratic Time</b> | <b>High Depression – Free Time Scores</b> |
|-------------------------------------------------------|------------------------------------------|-------------------------------------------|
| Root Mean Square Error of Approximation, Est. (.90CI) | 0.049 (0.027, 0.069)                     | 0.042 (0.000, 0.081)                      |
| CFI                                                   | 0.983                                    | 0.991                                     |
| Standardized Root Mean Square Residual                | 0.026                                    | 0.044                                     |

Table S3 - Income Grouping.

| <b>Income Values</b>                                                                                                             | <b>Recoded</b>    |
|----------------------------------------------------------------------------------------------------------------------------------|-------------------|
| 1 - 10,000<br>10,001 - 20,000<br>20,001 - 30,000<br>30,001 - 40,000                                                              | 0 – 40,000        |
| 40,001 - 50,000,<br>50,001 - 60,000,<br>60,001 - 70,000,<br>70,001 - 80,000                                                      | 40,001 – 80,000   |
| 80,001 - 90,000,<br>90,001 - 100,000,<br>100,001 - 110,000,<br>110,001 - 120,000                                                 | 80,001 – 120,000  |
| 120,001 - 130,000,<br>130,001 - 140,000,<br>140,001 - 150,000,<br>150,001 - 160,000                                              | 120,001 – 160,000 |
| 160,001 - 170,000,<br>170,001 - 180,000,<br>180,001 - 190,000,<br>190,001 - 200,000,<br>200,001 - 210,000,<br>210,001 - 220,000, | 160,000 +         |

|                                                                            |             |
|----------------------------------------------------------------------------|-------------|
| 220,001 - 230,000,<br>230,001 - 240,000,<br>240,001 - 250,000,<br>250,001+ |             |
| Do not know / prefer not to answer,<br>[Missing]                           | No response |

Table S4 - Employment Grouping.

| <b>Current Employment</b>                         | <b>Other (Text Response)</b>                                                                      | <b>Coded Value</b> |
|---------------------------------------------------|---------------------------------------------------------------------------------------------------|--------------------|
| Other                                             | Full time work with one furlough day due to covid                                                 | Full Time          |
| Other                                             | teacher in spring semester                                                                        | Full Time          |
| Other                                             | Teacher summer vacation                                                                           | Full Time          |
| Working full-time                                 |                                                                                                   | Full Time          |
| Working full-time,Other                           | on summer vacation                                                                                | Full Time          |
| Working full-time,Self-employed                   |                                                                                                   | Full Time          |
| Working full-time,Self-employed ,Other            | I'm working full time at a company, but also self-employed teaching (Not full-time-self-employed) | Full Time          |
| Homemaker                                         |                                                                                                   | Not Working        |
| Looking for work; unemployed                      |                                                                                                   | Not Working        |
| Looking for work; unemployed,Homemaker            |                                                                                                   | Not Working        |
| Looking for work; unemployed,Other                | housewife                                                                                         | Not Working        |
| Looking for work; unemployed,Other                | working - unpaid                                                                                  | Not Working        |
| Looking for work; unemployed,Temporarily laid off |                                                                                                   | Not Working        |
| Maternity or sick leave (volunteered)             |                                                                                                   | Not Working        |
| Other                                             | Leave of absence                                                                                  | Not Working        |



|                                                                                      |                                                |             |
|--------------------------------------------------------------------------------------|------------------------------------------------|-------------|
| Other                                                                                | Self employed but no work available            | Not Working |
| Other                                                                                | Stay at home parent                            | Not Working |
| Self-employed ,Looking for work; unemployed,Permanently disabled (volunteered),Other | Home based business not in market due to covid | Not Working |
| Self-employed ,Temporarily laid off                                                  |                                                | Not Working |
| Temporarily laid off                                                                 |                                                | Not Working |
| Temporarily laid off,Maternity or sick leave (volunteered)                           |                                                | Not Working |
| [Missing]                                                                            |                                                | Other       |
| Don't know/not sure                                                                  |                                                | Other       |
| Other                                                                                | Will be laid off during this study             | Other       |
| Other                                                                                |                                                | Other       |
| Prefer not to say                                                                    |                                                | Other       |
| Self-employed                                                                        |                                                | Other       |
| Working part-time                                                                    |                                                | Part Time   |
| Working part-time,Homemaker                                                          |                                                | Part Time   |
| Working part-time,Other                                                              | on CEWS                                        | Part Time   |
| Working part-time,Self-employed                                                      |                                                | Part Time   |
| Working part-time,Self-employed ,Homemaker                                           |                                                | Part Time   |
| Full-time student                                                                    |                                                | Student     |

|                                                                     |                      |         |
|---------------------------------------------------------------------|----------------------|---------|
| Looking for work; unemployed,Full-time student                      |                      | Student |
| Looking for work; unemployed,Part-time student                      |                      | Student |
| Looking for work; unemployed,Temporarily laid off,Part-time student |                      | Student |
| Part-time student                                                   |                      | Student |
| Self-employed ,Full-time student                                    |                      | Student |
| Temporarily laid off,Full-time student                              |                      | Student |
| Temporarily laid off,Part-time student                              |                      | Student |
| Working full-time,Full-time student                                 |                      | Student |
| Working full-time,Part-time student                                 |                      | Student |
| Working part-time,Full-time student                                 |                      | Student |
| Working part-time,Full-time student,Other                           | Support from parents | Student |
| Working part-time,Part-time student                                 |                      | Student |

Table S5 - Education Grouping.

| <b>Educational Status</b>                                                                                   | <b>Recoded</b>                       |
|-------------------------------------------------------------------------------------------------------------|--------------------------------------|
| High school diploma or a high school equivalency certificate                                                | High School or less                  |
| College, CEGEP or other non-university certificate or diploma (other than trades certificates or diplomas), | College, trade school or certificate |
| Trade certificate or diploma,                                                                               | College, trade school or certificate |
| University certificate or diploma below the bachelor's level                                                | College, trade school or certificate |
| Bachelor's degree (e.g. B.A., B.Sc., LL.B.)                                                                 | Bachelor or equivalent               |
| University certificate, diploma, degree above the bachelor's level                                          | Postgraduate / professional training |
| Prefer not to answer,                                                                                       | No response                          |
| [Missing]                                                                                                   | No response                          |

Note: "Less than high school diploma or its equivalent" was an option, but no participant selected it.

Table S6 - Cultural Background Grouping.

| <b>Cultural Background</b>                                                                                                     | <b>Other (Text Response)</b> | <b>Coded Value</b> |
|--------------------------------------------------------------------------------------------------------------------------------|------------------------------|--------------------|
| Chinese                                                                                                                        |                              | Asian              |
| Chinese,Filipino                                                                                                               |                              | Asian              |
| Chinese,South East Asian (e.g., Vietnamese, Cambodian, Malaysian, Laotian, etc)                                                |                              | Asian              |
| Filipino                                                                                                                       |                              | Asian              |
| Filipino,South East Asian (e.g., Vietnamese, Cambodian, Malaysian, Laotian, etc)                                               |                              | Asian              |
| Japanese                                                                                                                       |                              | Asian              |
| Korean                                                                                                                         |                              | Asian              |
| Other - please specify                                                                                                         | Taiwanese                    | Asian              |
| South Asian (e.g., East Indian, Pakistani, Sri Lankan, etc)                                                                    |                              | Asian              |
| South East Asian (e.g., Vietnamese, Cambodian, Malaysian, Laotian, etc)                                                        |                              | Asian              |
| Aboriginal decent (e.g., North American Indian, Métis or Inuit (Eskimo))                                                       |                              | Other              |
| Aboriginal decent (e.g., North American Indian, Métis or Inuit (Eskimo)),Black (e.g., African, Haitian, Jamaican, Somali, etc) |                              | Other              |
| Aboriginal decent (e.g., North American Indian, Métis or Inuit (Eskimo)),White                                                 |                              | Other              |

|                                                                                       |                                                                |       |
|---------------------------------------------------------------------------------------|----------------------------------------------------------------|-------|
| Arab                                                                                  |                                                                | Other |
| Black (e.g., African, Haitian, Jamaican, Somali, etc)                                 |                                                                | Other |
| Latin American                                                                        |                                                                | Other |
| Other - please specify                                                                |                                                                | Other |
| Other - please specify                                                                | european / mixed                                               | Other |
| Other - please specify                                                                | Doesn't let you choose more than one. Aboriginal and European. | Other |
| Other - please specify                                                                | Afghan                                                         | Other |
| Other - please specify                                                                | Austrian                                                       | Other |
| South Asian (e.g., East Indian, Pakistani, Sri Lankan, etc),Latin American            |                                                                | Other |
| West Asian (e.g., Iranian, Afghan, etc)                                               |                                                                | Other |
| White,Arab                                                                            |                                                                | Other |
| White,Chinese                                                                         |                                                                | Other |
| White,Chinese,South East Asian (e.g., Vietnamese, Cambodian, Malaysian, Laotian, etc) |                                                                | Other |
| White,Filipino                                                                        |                                                                | Other |
| White,Japanese                                                                        |                                                                | Other |
| White,Latin American                                                                  |                                                                | Other |
| White,Other - please specify                                                          | Jewish                                                         | Other |

|                                                                               |                  |       |
|-------------------------------------------------------------------------------|------------------|-------|
| White,Other - please specify                                                  | European         | Other |
| White,Other - please specify                                                  | Ashkenazi Jewish | Other |
| White,Other - please specify                                                  | Scandinavian     | Other |
| White,Other - please specify                                                  | Dutch            | Other |
| White,South East Asian (e.g., Vietnamese, Cambodian, Malaysian, Laotian, etc) |                  | Other |
| Other - please specify                                                        | Italian          | White |
| Other - please specify                                                        | IRISH            | White |
| White                                                                         |                  | White |

*Note: As cultural backgrounds were asked as check boxes, many participant selected multiple options, making it difficult to define groups. Therefore, participants were split into White, Asian and Other, as White and Asian participants made up a large majority of the sample.*

*Table S7 - Marital Status Groupings.*

| <b>Marital Status</b> | <b>Recoded</b>    |
|-----------------------|-------------------|
| Married               | Married           |
| Living common-law     | Married           |
| Separated             | No Longer Married |
| Divorced              | No Longer Married |
| Widowed               | No Longer Married |
| Single, never married | Single            |
| Prefer not to answer  | Other             |
| [Missing]             | Other             |

Table S8 - Weekly Survey Response Rate, N (%), by Experimental Grouping.

|           | <b>Week</b> |          |          |          |          |          |          |
|-----------|-------------|----------|----------|----------|----------|----------|----------|
|           | <b>0</b>    | <b>1</b> | <b>2</b> | <b>3</b> | <b>4</b> | <b>5</b> | <b>6</b> |
| WLC       | 83 (100%)   | 80 (96%) | 77 (93%) | 80 (96%) | 76 (92%) | 77 (93%) | 74 (89%) |
| HIIT      | 82 (100%)   | 77 (94%) | 76 (93%) | 69 (84%) | 72 (88%) | 64 (78%) | 68 (83%) |
| Yoga      | 86 (100%)   | 83 (97%) | 76 (88%) | 74 (86%) | 76 (88%) | 75 (87%) | 67(78%)  |
| HIIT+Yoga | 83 (100%)   | 75 (90%) | 75 (90%) | 69 (83%) | 69 (83%) | 66 (80%) | 84 (82%) |
|           | <b>Week</b> |          |          |          |          |          |          |
|           | <b>0</b>    | <b>1</b> | <b>2</b> | <b>3</b> | <b>4</b> | <b>5</b> | <b>6</b> |
| WLC       | 83 (100%)   | 80 (96%) | 77 (93%) | 80 (96%) | 76 (92%) | 77 (93%) | 74 (89%) |
| HIIT      | 82 (100%)   | 77 (94%) | 76 (93%) | 69 (84%) | 72 (88%) | 64 (78%) | 68 (83%) |
| Yoga      | 86 (100%)   | 83 (97%) | 76 (88%) | 74 (86%) | 76 (88%) | 75 (87%) | 67(78%)  |
| HIIT+Yoga | 83 (100%)   | 75 (90%) | 75 (90%) | 69 (83%) | 69 (83%) | 66 (80%) | 84 (82%) |



*Table S9 – Average Number of Minutes of DownDog Exercises Completed by Week and Experimental Group*

| <b>Week</b> | <b>HIIT</b>   | <b>Yoga</b>   | <b>Combo</b>  |
|-------------|---------------|---------------|---------------|
| 1           | 63.95 (29.73) | 73.13 (43.43) | 80.72 (48.48) |
| 2           | 64.44 (35.03) | 78.43 (46.70) | 86.04 (53.80) |
| 3           | 59.39 (35.49) | 76.76 (53.98) | 78.31 (45.19) |
| 4           | 58.90 (36.08) | 73.44 (59.71) | 74.20 (55.49) |
| 5           | 53.15 (36.85) | 68.57 (50.81) | 72.86 (56.29) |
| 6           | 46.11 (39.02) | 68.60 (57.62) | 70.97 (62.29) |

*Table S10 – Weekly Average (SD) Minutes of Moderate-to-Vigorous Physical Activity (Not Including App Usage) for Each Group*

| <b>Group</b> | <b>Week</b> | <b>Moderate</b> | <b>Vigorous</b> | <b>MVPA</b>    |
|--------------|-------------|-----------------|-----------------|----------------|
| Control      | 0           | 16.73 (33.25)   | 0.00 (0.00)     | 18.51 (34.53)  |
| Control      | 1           | 40.71 (81)      | 7.49 (21.95)    | 49.04 (90.77)  |
| Control      | 2           | 42.68 (63.32)   | 9.32 (29.21)    | 52.57 (72.50)  |
| Control      | 3           | 44.32 (60.7)    | 4.34 (15.37)    | 47.15 (65.95)  |
| Control      | 4           | 35.42 (48.19)   | 7.47 (21.26)    | 43.38 (57.89)  |
| Control      | 5           | 44.17 (67.25)   | 6.1 (18.66)     | 49.91 (72.59)  |
| Control      | 6           | 71.67 (83.48)   | 6.16 (16.89)    | 74.52 (81.26)  |
| HIIT         | 0           | 19.72 (34.26)   | 0.30 (2.46)     | 19.06 (34.79)  |
| HIIT         | 1           | 40.00 (52.03)   | 6.38 (19.11)    | 48.49 (60.39)  |
| HIIT         | 2           | 45.36 (59.22)   | 15.40 (35.00)   | 61.88 (74.94)  |
| HIIT         | 3           | 45.17 (66.58)   | 12.71 (26.82)   | 59.12 (79.29)  |
| HIIT         | 4           | 59.25 (82.2)    | 14.32 (31.79)   | 71.29 (89.25)  |
| HIIT         | 5           | 41.86 (55.51)   | 15.26 (31.00)   | 57.02 (73.43)  |
| HIIT         | 6           | 49.33 (80.68)   | 13.71 (29.41)   | 59.69 (88.17)  |
| Yoga         | 0           | 26.86 (38.26)   | 1.01 (4.25)     | 24.57 (36.49)  |
| Yoga         | 1           | 56.88 (89.41)   | 11.46 (31.36)   | 68.66 (107.56) |
| Yoga         | 2           | 44.42 (58.8)    | 7.17 (21.77)    | 52.58 (67.24)  |
| Yoga         | 3           | 47.84 (60.56)   | 14.18 (25.82)   | 58.15 (69.24)  |
| Yoga         | 4           | 56.94 (68.03)   | 16.54 (33.89)   | 73.38 (81.59)  |
| Yoga         | 5           | 73.46 (106.01)  | 11.42 (24.41)   | 85.07 (116.04) |

|       |   |               |               |                |
|-------|---|---------------|---------------|----------------|
| Yoga  | 6 | 51.58 (72.44) | 15.91 (30.62) | 66.75 (92.63)  |
| Combo | 0 | 18.87 (35.98) | 0.99 (4.11)   | 20.46 (37.72)  |
| Combo | 1 | 46.15 (97.01) | 10.73 (29.82) | 58.07 (103.51) |
| Combo | 2 | 32.46 (45.73) | 10.76 (27.46) | 43.43 (54.73)  |
| Combo | 3 | 56.52 (70.15) | 13.52 (25.7)  | 67.59 (74.84)  |
| Combo | 4 | 49.41 (68.91) | 17.70 (33.67) | 65.78 (85.26)  |
| Combo | 5 | 66.25 (99.03) | 10.79 (26.15) | 75.20 (112.14) |
| Combo | 6 | 53.49 (74.67) | 12.66 (29.28) | 59.75 (78.46)  |

Table S11 - Estimates for Trajectories for HIIT (A) and Comparisons with WLC, Yoga and HIIT+Yoga Groups (B1-3).

|                                                                                                                                                | <b>Estimate</b> | <b>SE</b>   | <b>95% CI</b>       |
|------------------------------------------------------------------------------------------------------------------------------------------------|-----------------|-------------|---------------------|
| <u>A. Estimates, SE, and 95% CI for intercept (I; estimated baseline), slope (S; time), and quadratic (Q; time<sup>2</sup>) terms for HIIT</u> |                 |             |                     |
| I                                                                                                                                              | <b>10.60</b>    | <b>0.64</b> | <b>9.34, 11.86</b>  |
| S                                                                                                                                              | <b>-0.93</b>    | <b>0.27</b> | <b>-1.45, -0.40</b> |
| Q                                                                                                                                              | <b>0.10</b>     | <b>0.04</b> | <b>0.03, 0.18</b>   |
| <u>B. Estimates for differences between each group and WLC</u>                                                                                 |                 |             |                     |
| <u>B1. Differences in estimates for I</u>                                                                                                      |                 |             |                     |
| WLC vs HIIT                                                                                                                                    | -0.26           | 0.87        | -1.97, 1.46         |
| Yoga vs HIIT                                                                                                                                   | -0.59           | 0.89        | -2.34, 1.16         |
| HIIT+Yoga vs HIIT                                                                                                                              | -1.53           | 0.87        | -3.23, 0.17         |
| <u>B2. Differences in estimates for S</u>                                                                                                      |                 |             |                     |
| WLC vs HIIT                                                                                                                                    | <b>0.77</b>     | <b>0.38</b> | <b>0.04, 1.51</b>   |
| Yoga vs HIIT                                                                                                                                   | 0.07            | 0.40        | -0.72, 0.86         |
| HIIT+Yoga vs HIIT                                                                                                                              | -0.14           | 0.40        | -0.93, 0.65         |
| <u>B3. Differences in estimates for Q</u>                                                                                                      |                 |             |                     |
| WLC vs HIIT                                                                                                                                    | -0.11           | 0.06        | -0.22, 0.00         |
| Yoga vs HIIT                                                                                                                                   | -0.03           | 0.06        | -0.15, 0.08         |
| HIIT+Yoga vs HIIT                                                                                                                              | 0.01            | 0.06        | -0.11, 0.12         |

Note: Results from the SEM. model estimating intercept, slope, and quadratic term for HIIT group (Section A) and comparisons of these estimates with those of the three other groups (WLC, Yoga, HIIT+Yoga; Section B). Bold text denotes  $p < .05$

Table S12 - Estimates for Trajectories for HIIT+Yoga (A) and Comparisons with WLC, HIIT and Yoga Groups (B1-3).

|                                                                                                                                                     | <b>Estimate</b> | <b>SE</b>   | <b>95% CI</b>       |
|-----------------------------------------------------------------------------------------------------------------------------------------------------|-----------------|-------------|---------------------|
| <u>A. Estimates, SE, and 95% CI for intercept (I; estimated baseline), slope (S; time), and quadratic (Q; time<sup>2</sup>) terms for HIIT+Yoga</u> |                 |             |                     |
| I                                                                                                                                                   | <b>9.07</b>     | <b>0.58</b> | <b>7.93, 10.20</b>  |
| S                                                                                                                                                   | <b>-1.07</b>    | <b>0.30</b> | <b>-1.65, -0.48</b> |
| Q                                                                                                                                                   | <b>0.11</b>     | <b>0.05</b> | <b>0.02, 0.19</b>   |
| <u>B. Estimates for differences between each group and WLC</u>                                                                                      |                 |             |                     |
| <u>B1. Differences in estimates for I</u>                                                                                                           |                 |             |                     |
| WLC vs HIIT+Yoga                                                                                                                                    | 1.27            | 0.83        | -0.35, 2.89         |
| HIIT vs HIIT+Yoga                                                                                                                                   | 1.53            | 0.87        | -0.17, 3.23         |
| Yoga vs HIIT+Yoga                                                                                                                                   | 0.94            | 0.85        | -0.72, 2.59         |
| <u>B2. Differences in estimates for S</u>                                                                                                           |                 |             |                     |
| WLC vs HIIT+Yoga                                                                                                                                    | <b>0.92</b>     | <b>0.39</b> | <b>0.14, 1.69</b>   |
| HIIT vs HIIT+Yoga                                                                                                                                   | 0.14            | 0.40        | -0.65, 0.93         |
| Yoga vs HIIT+Yoga                                                                                                                                   | 0.21            | 0.42        | -0.62, 1.04         |
| <u>B3. Differences in estimates for Q</u>                                                                                                           |                 |             |                     |
| WLC vs HIIT+Yoga                                                                                                                                    | -0.11           | 0.06        | -0.23, 0.01         |
| HIIT vs HIIT+Yoga                                                                                                                                   | -0.01           | 0.06        | -0.12, 0.11         |
| Yoga vs HIIT+Yoga                                                                                                                                   | -0.04           | 0.06        | -0.16, 0.09         |

Note: Results from the SEM model estimating intercept, slope, and quadratic term for HIIT+Yoga group (Section A) and comparisons of these estimates with those of the three other groups (WLC, HIIT, Yoga; Section B). Bold text denotes  $p < .05$

Table S13 - Estimates for Trajectories for Yoga (A) and Comparisons with WLC, HIIT and HIIT+Yoga Groups (B1-3).

|                                                                                                                                                | <b>Estimate</b> | <b>SE</b>   | <b>95% CI</b>       |
|------------------------------------------------------------------------------------------------------------------------------------------------|-----------------|-------------|---------------------|
| <u>A. Estimates, SE, and 95% CI for intercept (I; estimated baseline), slope (S; time), and quadratic (Q; time<sup>2</sup>) terms for Yoga</u> |                 |             |                     |
| I                                                                                                                                              | <b>10.01</b>    | <b>0.62</b> | <b>8.78, 11.23</b>  |
| S                                                                                                                                              | <b>-0.86</b>    | <b>0.31</b> | <b>-1.45, -0.26</b> |
| Q                                                                                                                                              | 0.07            | 0.05        | -0.02, 0.16         |
| <u>B. Estimates for differences between each group and WLC</u>                                                                                 |                 |             |                     |
| <u>B1. Differences in estimates for I</u>                                                                                                      |                 |             |                     |
| WLC vs Yoga                                                                                                                                    | 0.34            | 0.86        | -1.34, 2.02         |
| HIIT vs Yoga                                                                                                                                   | 0.59            | 0.89        | -1.16, 2.34         |
| HIIT+Yoga vs Yoga                                                                                                                              | -0.94           | 0.85        | -2.59, 0.72         |
| <u>B2. Differences in estimates for S</u>                                                                                                      |                 |             |                     |
| WLC vs Yoga                                                                                                                                    | 0.70            | 0.40        | -0.08, 1.49         |
| HIIT vs Yoga                                                                                                                                   | -0.07           | 0.40        | -0.86, 0.72         |
| HIIT+Yoga vs Yoga                                                                                                                              | -0.21           | 0.422       | -1.04, 0.62         |
| <u>B3. Differences in estimates for Q</u>                                                                                                      |                 |             |                     |
| WLC vs Yoga                                                                                                                                    | -0.08           | 0.06        | -0.20, 0.05         |
| HIIT vs Yoga                                                                                                                                   | 0.03            | 0.06        | -0.08, 0.15         |
| HIIT+Yoga vs Yoga                                                                                                                              | 0.04            | 0.06        | -0.09, 0.16         |

Note: Results from the SEM. model estimating intercept, slope, and quadratic term for HIIT group (Section A) and comparisons of these estimates with those of the three other groups (WLC, HIIT, HIIT+Yoga; Section B). Bold text denotes  $p < .05$

Table S14 - Effect Sizes for Model with all Individuals and Model including only those with High Depressive Symptoms at Baseline.

| <b>All Participants</b> |                    |                |                    |                |                    |                |
|-------------------------|--------------------|----------------|--------------------|----------------|--------------------|----------------|
| <b>Time</b>             | <b>HIIT</b>        |                | <b>Yoga</b>        |                | <b>HIIT+Yoga</b>   |                |
|                         | <b>Effect Size</b> | <b>95% CI</b>  | <b>Effect Size</b> | <b>95% CI</b>  | <b>Effect Size</b> | <b>95% CI</b>  |
| Week 1                  | -0.12              | [-0.23, -0.01] | -0.11              | [-0.23, 0.01]  | -0.14              | [-0.26, -0.03] |
| Week 2                  | -0.20              | [-0.39, -0.01] | -0.20              | [-0.39, 0.00]  | -0.24              | [-0.44, -0.05] |
| Week 3                  | -0.24              | [-0.48, 0.00]  | -0.25              | [-0.49, -0.02] | -0.31              | [-0.54, -0.07] |
| Week 4                  | -0.24              | [-0.50, 0.02]  | -0.28              | [-0.53, -0.04] | -0.33              | [-0.58, -0.08] |
| Week 5                  | -0.21              | [-0.48, 0.06]  | -0.29              | [-0.52, -0.06] | -0.31              | [-0.55, -0.07] |
| Week 6                  | -0.14              | [-0.44, 0.16]  | -0.27              | [-0.51, -0.04] | -0.25              | [-0.51, 0.00]  |

| <b>Subpopulation with High Depressive Symptoms</b> |                    |                |                    |                |                    |                |
|----------------------------------------------------|--------------------|----------------|--------------------|----------------|--------------------|----------------|
| <b>Time</b>                                        | <b>HIIT</b>        |                | <b>Yoga</b>        |                | <b>HIIT+Yoga</b>   |                |
|                                                    | <b>Effect Size</b> | <b>95% CI</b>  | <b>Effect Size</b> | <b>95% CI</b>  | <b>Effect Size</b> | <b>95% CI</b>  |
| Week 1                                             | -0.41              | [-0.69, -0.14] | -0.40              | [-0.67, -0.14] | -0.44              | [-0.71, -0.18] |
| Week 2                                             | -0.83              | [-1.38, -0.28] | -0.80              | [-1.33, -0.28] | -0.89              | [-1.43, -0.35] |

|        |       |                |       |                |       |                |
|--------|-------|----------------|-------|----------------|-------|----------------|
| Week 3 | -1.20 | [-2.01, -0.40] | -1.17 | [-1.94, -0.39] | -1.29 | [-2.07, -0.51] |
| Week 4 | -1.57 | [-2.62, -0.52] | -1.52 | [-2.53, -0.51] | -1.68 | [-2.70, -0.67] |
| Week 5 | -1.94 | [-3.21, -0.66] | -1.88 | [-3.11, -0.65] | -2.08 | [-3.32, -0.84] |
| Week 6 | -2.34 | [-3.87, -0.81] | -2.27 | [-3.74, -0.80] | -2.51 | [-4.00, -1.01] |

*Note: All effect sizes are compared to the WLC group.*



*Table S15 - Estimates for Trajectories for WLC (A) and Comparisons with WLC, HIIT and HIIT+Yoga Groups (B1 & B2) in Participants with High Levels of Depression Symptoms at Baseline.*

|                                                                                   | <b>Estimate</b> | <b>SE</b>   | <b>95% CI</b>       |
|-----------------------------------------------------------------------------------|-----------------|-------------|---------------------|
| <u>A. Estimates, SE, and 95% CI for intercept (I) and slope (S) terms for WLC</u> |                 |             |                     |
| I                                                                                 | <b>14.41</b>    | <b>0.56</b> | <b>13.32, 15.51</b> |
| S                                                                                 | <b>-1.18</b>    | <b>0.44</b> | <b>-2.05, -0.31</b> |
| <u>B. Estimates for differences between each group and WLC</u>                    |                 |             |                     |
| <u>B1. Differences in estimates for I</u>                                         |                 |             |                     |
| HIIT vs WLC                                                                       | 1.04            | 0.85        | -0.62, 2.70         |
| Yoga vs WLC                                                                       | 0.52            | 0.81        | -1.06, 2.10         |
| HIIT+Yoga vs WLC                                                                  | -0.26           | 0.83        | -1.89, 1.38         |
| <u>B2. Differences in estimates for S</u>                                         |                 |             |                     |
| HIIT vs WLC                                                                       | <b>-2.06</b>    | <b>0.68</b> | <b>-3.39, -0.73</b> |
| Yoga vs WLC                                                                       | <b>-2.00</b>    | <b>0.65</b> | <b>-3.28, -0.72</b> |
| HIIT+Yoga vs WLC                                                                  | <b>-2.21</b>    | <b>0.67</b> | <b>-3.52, -0.90</b> |

*Note: Results from the SEM model, including only those with high levels of depressive symptoms at baseline, estimating intercept and slope for waitlist control (Section A) and comparisons of these estimates with those of the three active groups (HIIT, Yoga, HIIT+Yoga; Section B). Bold text denotes  $p < .05$*

**Figures**

*Figure S1 - SEM Path Diagram for Model including all Participants.*

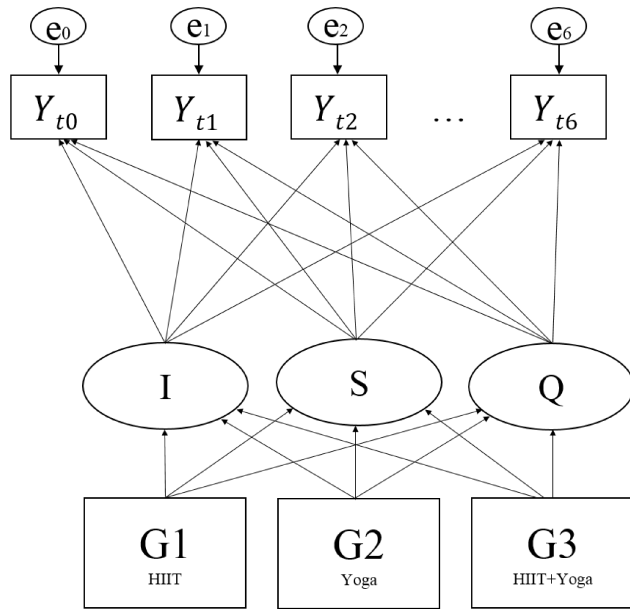

*Figure S2 - SEM Path Diagram for Model including Participants with High Baseline Depressive Symptoms.*

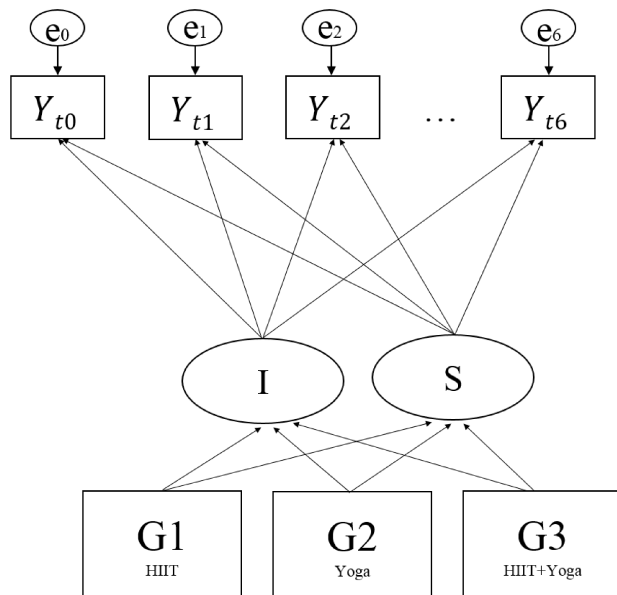

Supplement: bjsports-2021-104379supp001_data_supplement.pdf [file bjsports-2021-104379supp001_data_supplement.pdf]
